# Supplementary material for: Occupational Therapy for People with Early Parkinson's Disease: A Retrospective Program Evaluation
Source: Parkinsons Dis. 2022 Jul 13;2022:1931468. doi: 10.1155/2022/1931468 (PMC9300278; doi:10.1155/2022/1931468)
Supplement: Supplementary Materials — Supplemental Material 1. STROBE statement: completed checklist for Strengthening the Reporting for Observational Studies in Epidemiology. Supplemental Material 2. Occupational therapy (OT) evaluation and intervention: a list of typical evaluation and intervention items from the consultative OT session. Supplemental Material 3. Phone survey and semistructured interview discussion topics. [file 1931468.f1.zip]

Archive with 3 entries (3 files):
- 1931468.f1/Supplemental Material 1.pdf
- 1931468.f1/Supplemental Material 2.docx
- 1931468.f1/Supplemental Material 3.docx
